# Supplementary material for: Cap-independent co-expression of dsRNA-sensing and NF-κB pathway inhibitors enables controllable self-amplifying RNA expression with reduced immunotoxicity
Source: eLife. 2025 Aug 29;14:RP105978. doi: 10.7554/eLife.105978 (PMC12396818; doi:10.7554/eLife.105978)
Supplement: Appendix 1—figure 2—source data 1. [file elife-105978-app1-fig2-data1.xlsx]

## Sheet: Sheet1
Appendix 3—figure 1b
BioTracker signal (normalized to pre-treatment values)
Biol Rep:	A	B	C	A	B	C	A	B	C
Day	No treatment control			Mock transfection			Mock + Staurosporine
1	0.948596	0.902761	0.894825	1.26571	1.33074	1.28672	0.694506	0.569688	0.68596
2	0.95393	0.860191	0.944171	1.16227	1.38685	1.38024	0.278096	0.235717	0.2573
3	0.894083	0.779693	0.895057	1.14477	1.25132	1.32705	0.164293	0.158676	0.147181
5	0.904904	0.713433	0.815269	1.35895	1.28741	1.43225	0.133089	0.140133	0.119848
Appendix 3—figure 1d
Calcien AM signal (normalized to pre-treatment values)
Biol Rep:	A	B	C	A	B	C	A	B	C
Day	No treatment control			Mock transfection			Mock + Staurosporine
1	1.21793	1.11008	0.97037	1.15286	1.09438	1.0318	0.261187	0.215946	0.213797
2	1.0447	0.986952	0.835239	1.03427	1.06242	0.877064	0.048311	0.02978	0.038804
3	1.06123	0.919921	0.694966	1.01952	1.05141	0.752779	0.016735	0.012839	0.013232
5	0.981849	0.860213	0.835902	0.952732	0.999781	0.793355	0.00975	0.010097	0.007706
