# Supplementary material for: Cap-independent co-expression of dsRNA-sensing and NF-κB pathway inhibitors enables controllable self-amplifying RNA expression with reduced immunotoxicity
Source: eLife. 2025 Aug 29;14:RP105978. doi: 10.7554/eLife.105978 (PMC12396818; doi:10.7554/eLife.105978)
Supplement: Figure 1—figure supplement 1—source data 1. [file elife-105978-fig1-figsupp1-data1.xlsx]

## Sheet: Sheet1
Figure 1—figure supplement 1a
BioTracker AUC (AU × days)
Biol Rep	Mock Transfection	Conventional saRNA	E3	E3-NSs-L*
A	28.84	8.517	17.44	21.64
B	31.02	8.541	17.62	20.12
C	30.54	14.12	23.2	29.74
D	17.31	19.01	25.24	38.05
E	34.47	12.76	20.47	28.93
F	28.19	18.21	24.44	33.1
G	40.14	8.228	13.77	19.77
H	48.73	10.09	14.76	33.76
I	34.81	12.21	25.31	25.78
J	64.31	9.412	28.87	46.4
K	52.12	5.847	23.13	24.14
Figure 1—figure supplement 1a
CellTag 700 signal
Biol Rep	Conventional saRNA	E3	E3-NSs-L*
A	0.402099	0.642046	0.791085
B	0.49099	0.745675	0.906152
C	0.403071	0.579176	0.690388
D	0.479253	0.678813	0.860507
E	0.86311	1.055	1.55382
F	0.977851	0.928885	1.3419
G	0.971757	1.04185	1.09878
H	0.988175	1.00799	1.13706
I	0.968422	0.98932	1.0974
J	0.461291	1.08731	0.828614
K	0.465265	0.619889	0.891308
L	0.870762	1.61404	1.37943
M	0.679184	0.742502	1.00717
N	0.645509	0.732821	0.939265
O	0.638118	0.664834	0.884378
P	0.779031	0.80894	0.823057
Q	0.588432	0.789655	0.820598
R	0.616832	0.770934	0.70615
S	1.10357	0.896082	0.900221
T	0.793975	0.847162	0.885581
U	0.811876	1.04374	1.01808
V	0.448379	0.510714	0.599596
W	0.422834	0.899309	0.623929
X	0.563176	0.643158	0.652199
Y	0.435896	0.703297	0.705743
Z	0.830398	0.929224	0.971821
AA	0.470908	0.622299	0.792849
BB	0.647971	0.807154	0.84406
CC	0.600802	0.730875	0.748592
Figure 1—figure supplement 1c
Calcien AM fluorescence (AU)
	Vehicle		10 μM ML336
Biol Rep	Mock Transfection	Conventional saRNA	Mock Transfection	Conventional saRNA
A	62.9928	14.714	103.907	123.807
B	95.0053	66.9866	103.6	76.1197
C	99.9443	74.644	94.1569	80.4393
D	77.6639	41.6931	60.1463	79.1438
