# Supplementary material for: Cap-independent co-expression of dsRNA-sensing and NF-κB pathway inhibitors enables controllable self-amplifying RNA expression with reduced immunotoxicity
Source: eLife. 2025 Aug 29;14:RP105978. doi: 10.7554/eLife.105978 (PMC12396818; doi:10.7554/eLife.105978)
Supplement: Figure 1—source data 2. [file elife-105978-fig1-data2.xlsx]

## Sheet: Sheet1
Figure 1d
EGFP signal (normalized to day 0 BioTracker signal)
Biol Rep:	A	B	C	D	E	F	G	H	I	J	K	A	B	C	D	E	F	G	H	I	J	K	A	B	C	D	E	F	G	H	I	J	K	A	B	C	D	E	F	G	H	I	J	K
Day	Mock Transfection											Conventional saRNA											E3											E3-NSs-L*
1	0.018392	0.032109	0.035451	0.016648	0.040714	0.058217	0.007615	0.005342	0.001336	0.001128	0.021547	0.275019	0.17779	0.091429	0.1503	0.110828	0.142047	0.117247	0.102361	0.281431	0.029161	0.074305	0.846326	0.611685	0.529366	0.864788	0.679891	0.682781	1.04498	0.819347	1.42108	0.4058	0.805492	0.199008	0.196539	0.101586	0.178828	0.188459	0.17065	0.141205	0.170949	0.277085	0.094295	0.169348
3	0.025874	0.038096	0.026212	0.01664	0.049925	0.042555	0.013179	0.013655	0.000205	0.041544	0.00873	0.141114	0.12014	0.063788	0.091521	0.079074	0.083652	0.099445	0.086249	0.183723	0.016217	0.053581	0.380122	0.316541	0.238772	0.240312	0.281806	0.279993	0.697411	0.419819	1.80332	0.383078	1.03828	0.226259	0.229225	0.101017	0.102021	0.131356	0.095672	0.191302	0.236566	0.300666	0.110214	0.198894
7	0.02842	0.038483	0.048861	0.020592	0.05492	0.055781	0.010938	0.008261	-0.00029	0.020926	0.017121	0.129669	0.10596	0.050077	0.042131	0.044104	0.035899	0.068201	0.044826	0.068857	0.009979	0.035568	0.375177	0.293913	0.378481	0.354683	0.346169	0.288327	0.43116	0.494512	0.830807	0.272155	0.672797	0.264334	0.225541	0.075242	0.040738	0.060669	0.043488	0.172167	0.169865	0.211399	0.162195	0.210854
14	0.017027	0.040359	0.060026	0.016261	0.048217	0.05616	0.025144	0.016302	0.008681	-0.00385	-0.00968	0.098879	0.070008	0.057783	0.035186	0.045015	0.024862	0.03478	0.01365	0.017336	-0.01754	0.005298	0.319096	0.290478	0.381929	0.147426	0.15742	0.099823	0.448355	0.471667	0.571853	0.17333	0.337581	0.170245	0.157851	0.052441	0.022485	0.042856	0.028859	0.091	0.035263	0.088983	0.064152	0.13264
21	0.017569	0.047368	0.058813	0.018026	0.050459	0.060004	0.01126	0.012507	0.007411	0.085867	0.048574	0.105783	0.104054	0.053495	0.035783	0.031168	0.01904	0.01129	0.008723	0.000217	0.040641	0.054353	0.326511	0.262372	0.236463	0.069426	0.080091	0.04357	0.353442	0.339536	0.432941	0.193275	0.405307	0.122553	0.205624	0.045273	0.014405	0.026531	0.017211	0.053785	0.022505	0.051719	0.072262	0.081031
Figure 1e
mScarlet3 signal (normalized to day 0 BioTracker signal)
Biol Rep:	A	B	C	D	E	F	G	H	I	J	K	A	B	C	D	E	F	G	H	I	J	K	A	B	C	D	E	F	G	H	I	J	K	A	B	C	D	E	F	G	H	I	J	K
Day	Mock Transfection											Conventional saRNA											E3											E3-NSs-L*
1	0.013381	0.024425	0.024083	0.012882	0.029455	0.045531	-0.00096	-0.00249	0.001947	0.031075	0.06446	0.58333	0.409908	0.067075	0.090469	0.073959	0.083552	0.313563	0.09549	0.882748	0.106214	0.20716	3.47802	2.98937	0.876018	1.57013	1.69183	1.0581	3.68285	1.22872	8.59621	1.31466	2.67732	0.696193	0.71257	0.158784	0.285824	0.308236	0.262056	0.882713	0.432767	2.33641	0.761904	1.43189
3	0.023307	0.037866	0.0241	0.015227	0.04731	0.037993	0.002364	0.009939	0.004614	0.037362	0.012369	0.136605	0.113848	0.039926	0.040515	0.047352	0.037826	0.101792	0.040474	0.300394	0.022272	0.061472	0.679121	0.67418	0.177126	0.206058	0.298615	0.24321	1.15554	0.256214	6.06493	0.712286	1.77086	0.465404	0.572735	0.108079	0.100896	0.151011	0.113986	0.663114	0.308297	1.95572	0.426211	0.747802
7	0.024825	0.033633	0.047412	0.017872	0.048563	0.047164	0.010405	0.010514	0.007688	0.027738	0.027256	0.1093	0.09239	0.040285	0.029987	0.031993	0.023738	0.062031	0.022894	0.112822	0.018226	0.040568	0.842945	0.800192	0.472191	0.205464	0.264924	0.162624	1.34536	0.784284	3.39242	0.79092	1.84821	0.541749	0.579222	0.087352	0.057271	0.082089	0.063256	1.22048	0.239274	1.91539	0.45625	0.9245
14	0.01805	0.038905	0.062426	0.017097	0.05005	0.061139	0.021355	0.013607	0.015636	0.041561	0.035987	0.10431	0.078376	0.050266	0.03064	0.042519	0.032374	0.039186	0.01256	0.051558	0.020408	0.044437	1.13532	1.1513	0.444659	0.13279	0.174098	0.09865	1.83806	0.705513	2.24097	1.20201	2.29098	0.301816	0.355889	0.063865	0.03856	0.066571	0.047985	0.401236	0.080968	0.665629	0.296789	0.504485
21	0.019963	0.04793	0.063466	0.019089	0.056114	0.064015	0.011806	0.014802	0.018838	0.076758	0.050831	0.137352	0.109169	0.052949	0.03427	0.03368	0.021764	0.021602	0.012465	0.031894	0.053115	0.063645	0.952004	0.933568	0.322177	0.093212	0.129899	0.066315	1.04047	0.55721	1.4247	1.23313	1.68511	0.226481	0.352891	0.056622	0.029111	0.052291	0.032797	0.218719	0.058096	0.37929	0.286308	0.33355
Figure 1f
BioTracker signal (normalized to day 0 BioTracker signal)
Biol Rep:	A	B	C	D	E	F	G	H	I	J	K	A	B	C	D	E	F	G	H	I	J	K	A	B	C	D	E	F	G	H	I	J	K	A	B	C	D	E	F	G	H	I	J	K
Day	Mock Transfection											Conventional saRNA											E3											E3-NSs-L*
1	1.62971	1.78422	1.86048	1.32131	1.90642	1.86346	2.33398	2.55954	2.10839	2.71082	2.59633	1.30074	1.30609	1.60452	2.15921	1.29487	1.85811	1.21301	1.53344	1.7591	0.975615	0.775106	2.1323	2.06955	2.50442	2.65422	2.07894	2.73098	1.84735	2.40736	2.18664	2.30526	2.26733	1.69504	1.52096	2.00269	2.38591	1.71098	2.02459	2.11343	2.75806	2.34885	2.21575	2.03666
3	1.75888	1.93315	1.98287	1.09134	1.95277	1.68377	2.53868	3.03361	2.25014	3.45912	2.8374	0.587914	0.708933	1.2385	1.43916	1.00123	1.43882	0.668769	0.784186	1.02122	0.675901	0.44335	1.34603	1.42973	1.97019	1.9689	1.58601	2.38193	1.24998	1.22765	2.45297	2.15271	1.60642	1.63385	1.59719	2.25414	2.54039	1.9635	2.42567	1.70117	2.43661	2.23477	2.96252	1.59765
7	1.63912	1.78801	1.71009	1.03043	1.74778	1.60327	2.24485	2.6748	1.85881	3.88848	3.03959	0.400906	0.453419	0.762308	1.02886	0.681191	0.955175	0.449987	0.515237	0.637314	0.520171	0.326256	0.959886	0.974149	1.33743	1.35697	1.14554	1.15604	0.780091	0.750469	1.32851	1.6011	1.4235	1.31306	1.20776	1.76246	2.19002	1.55546	1.81906	1.13511	1.92671	1.43393	2.7833	1.41989
14	1.27907	1.38902	1.32194	0.792207	1.38328	1.23794	1.74867	2.06616	1.49367	3.049	2.49931	0.362445	0.278951	0.478844	0.722841	0.45977	0.681464	0.265442	0.335299	0.391465	0.354823	0.201665	0.62388	0.625856	0.789586	0.933953	0.719275	0.81189	0.40926	0.426394	0.865497	1.19243	0.884383	0.83329	0.738106	1.17708	1.62216	1.18846	1.37861	0.671283	1.30099	0.914348	2.10367	1.02333
21	1.13177	1.10811	1.16429	0.430434	2.11681	1.08258	1.60181	2.25466	1.50613	2.42588	1.94191	0.202987	0.189174	0.35823	0.518922	0.428135	0.573924	0.193107	0.291985	0.325403	0.304078	0.153121	0.464798	0.435004	0.542436	0.763799	0.657514	0.721252	0.289506	0.446125	0.685263	0.843787	0.578772	0.566896	0.571583	0.869941	1.32573	1.27341	1.18346	0.459848	1.14051	0.696917	1.50355	0.667149
