# Supplementary material for: Cap-independent co-expression of dsRNA-sensing and NF-κB pathway inhibitors enables controllable self-amplifying RNA expression with reduced immunotoxicity
Source: eLife. 2025 Aug 29;14:RP105978. doi: 10.7554/eLife.105978 (PMC12396818; doi:10.7554/eLife.105978)
Supplement: Figure 2—source data 1. [file elife-105978-fig2-data1.xlsx]

## Sheet: Sheet1
Figure 2c
Annexin V area (normalized to average of mock transfection)
Biol Rep:	A	B	C	D	E	F	A	B	C	D	E	F	A	B	C	D	E	F	A	B	C	D	E	F	A	B	C	D	E	F
Day	0.5 μM Staurosporine						Mock Transfection						Conventional saRNA						E3						E3-NSs-L*
1	5.58523	3.85413	2.24912	3.60946	2.30284	1.172	1.21638	0.941235	1.00211	1.16691	0.883824	0.78955	2.79013	1.82259	1.6284	3.43966	1.07464	0.887438	1.14787	1.21033	1.23351	1.78758	0.891274	0.7967	1.27589	1.11078	0.993376	1.10787	1.12016	0.911628
2	2.85332	1.49889	0.694447	1.54217	0.675618	0.54524	1.22643	1.01262	0.890733	1.39899	0.785977	0.685249	3.43593	1.79402	1.41409	2.94609	0.911964	0.854957	2.1896	2.61119	1.5214	3.02779	1.37452	0.851407	1.81568	1.61491	1.0135	1.45934	0.753904	0.743356
3	2.7154	1.09114	0.698476	1.34947	0.592353	0.277309	1.11051	1.49131	0.976279	1.18038	0.778253	0.463269	2.15215	1.50426	0.81379	1.74747	0.658368	0.607125	3.57564	3.17338	2.47496	2.87258	1.97599	0.573984	1.97971	1.9608	1.41725	1.33861	0.923591	0.564306
4	1.84717	1.07249	0.868132	1.28971	0.588293	0.327825	1.16911	1.32016	0.835083	1.28641	0.961563	0.427671	2.11227	1.74065	0.999919	2.01548	0.577037	0.531022	3.68656	3.55534	2.49381	3.21573	1.57086	0.682586	2.1096	2.9648	1.71787	2.02396	1.29087	0.661778
5	1.53814	0.903933	0.735821	1.06954	0.515919	0.507826	1.2797	1.66498	0.639854	1.03552	0.926219	0.453723	2.2624	1.65512	0.915047	1.67202	0.52759	0.429776	3.76627	3.14028	2.25986	2.94426	1.22273	0.446651	2.35174	2.61737	1.75845	1.87434	1.25598	0.680579
6	0.650002	0.344783	0.282859	0.570779	0.199512	2.55007	1.1173	1.41404	0.80923	1.22178	0.948161	0.489485	2.00598	1.36036	1.10527	1.95066	0.520582	0.383082	3.47158	3.04399	2.20385	3.01896	1.43138	0.535711	2.09601	2.30893	1.53702	1.54655	1.15878	0.605944
Figure 2d
Calcien AM Fluorescence (normalized to day 0 biotracker)
Biol Rep	0.5 μM Staurosporine	Mock Transfection	Conventional saRNA	E3	E3-NSs-L*
A	7.7593	46.1898	26.135	30.328	39.0741
B	7.8235	62.4649	43.374	42.5919	49.9244
C	5.47393	34.1092	19.6618	29.861	34.593
D	7.27065	56.4661	28.8102	41.2257	43.3062
E	4.8783	42.4622	27.7228	35.1395	39.7013
F	1.56316	33.5628	8.27911	17.6201	27.823
