# Supplementary material for: Cap-independent co-expression of dsRNA-sensing and NF-κB pathway inhibitors enables controllable self-amplifying RNA expression with reduced immunotoxicity
Source: eLife. 2025 Aug 29;14:RP105978. doi: 10.7554/eLife.105978 (PMC12396818; doi:10.7554/eLife.105978)
Supplement: Figure 3—figure supplement 1—source data 1. [file elife-105978-fig3-figsupp1-data1.xlsx]

## Sheet: Sheet1
Figure 3—figure supplement 1a
PKR / CellTag (normalized to mock transfection)
Biol Rep	Conventional saRNA	E3	E3-NSs-L*
A	1.19346	1.169	1.06989
B	1.28709	1.22774	0.987331
C	1.32269	1.28072	1.02591
D	1.34655	1.33428	1.13302
Figure 3—figure supplement 1b
ΔRIN (difference from mock transfection)
Biol Rep	E3	E3-NSs-L*
A	0.1	0.5
B	-0.1	0.3
C	-0.3	0
D	-0.1	0
E	-0.4	-0.1
Figure 3—figure supplement 1c
anti-puromycin / CellTag
Biol Rep	Mock Transfection	Conventional saRNA	E3	E3-NSs-L*
A	3.392	0.741285	2.89825	3.50875
B	2.43744	0.370031	1.72502	1.51047
C	3.65336	0.95489	1.52299	2.75424
D	1.65982	0.070308	0.689511	1.26936
E	1.91397	0.46878	1.33308	1.78865
