# Supplementary material for: Cap-independent co-expression of dsRNA-sensing and NF-κB pathway inhibitors enables controllable self-amplifying RNA expression with reduced immunotoxicity
Source: eLife. 2025 Aug 29;14:RP105978. doi: 10.7554/eLife.105978 (PMC12396818; doi:10.7554/eLife.105978)
Supplement: Figure 3—source data 1. [file elife-105978-fig3-data1.xlsx]

## Sheet: Sheet1
Figure 3a
phospho-eIF2α / Total eIF2α (normalized to mock transfection)
Biol Rep	Native saRNA	E3	E3-NSs-L*
A	1.21198	0.951426	0.97847
B	1.20327	0.843148	0.803604
C	1.57203	0.775497	0.611073
D	0.940616	0.543209	0.385822
E	1.2746	0.579424	0.42763
F	1.56948	1.16552	1.36316
Figure 3b
Total eIF2α / CellTag (normalized to mock transfection)
Biol Rep	Native saRNA	E3	E3-NSs-L*
A	1.04948	1.2841	1.13503
B	0.920235	1.12575	1.37748
C	1.09608	1.13045	1.32763
D	1.07103	1.24829	1.36209
E	0.957998	1.10902	1.36478
Figure 3c
phospho-eIF4E / Total eIF4E
Biol Rep	Mock Transfection	Conventional saRNA	E3	E3-NSs-L*
A	21.802	14.1343	16.4943	9.20696
B	13.9607	5.50324	7.6051	11.7037
C	20.4279	11.1217	11.0625	12.2422
D	13.8591	8.42397	13.7782	14.9085
E	15.7859	10.0405	5.03021	9.17969
F	10.0633	8.58408	2.74535	4.95599
Figure 3d
Total eIF4E / CellTag
Biol Rep	Mock Transfection	Conventional saRNA	E3	E3-NSs-L*
A	0.071465	0.138025	0.176796	0.130966
B	0.169459	-0.0061	0.093191	0.104533
C	0.133095	0.07712	0.121315	0.095824
D	0.101452	0.090375	0.095796	0.106968
E	0.126459	0.139233	0.185537	0.098823
F	0.09743	0.051624	0.051325	0.0703
