# Supplementary material for: Cap-independent co-expression of dsRNA-sensing and NF-κB pathway inhibitors enables controllable self-amplifying RNA expression with reduced immunotoxicity
Source: eLife. 2025 Aug 29;14:RP105978. doi: 10.7554/eLife.105978 (PMC12396818; doi:10.7554/eLife.105978)
Supplement: Figure 4—figure supplement 1—source data 1. [file elife-105978-fig4-figsupp1-data1.xlsx]

## Sheet: Sheet1
Appendix 4—Figure 1
IFN-γ (Normalized to day 0 CellTag)						IFN-γ (Scaled to 100% for visualization)
Biol Rep	Mock Transfection	Conventional saRNA	E3	E3-NSs-L*		Biol Rep	Mock Transfection	Conventional saRNA	E3	E3-NSs-L*
A	0.466554	3.2135	1.95797	1.53944		A	14.5186	100	60.9295	47.9053
B	0.721844	2.8321	2.81825	4.49995		B	16.0412	62.9362	62.6286	100
C	0.816343	2.11201	2.30897	1.37229		C	35.3553	91.4699	100	59.433
D	0.355982	2.73981	4.33421	7.1589		D	4.97258	38.2714	60.543	100
E	0.581941	1.82098	1.68316	0.919282		E	31.9576	100	92.4316	50.4829
F	0.363554	2.06598	3.8339	2.82347		F	9.48262	53.8872	100	73.6449
						Average	18.7213	74.4275	79.4221	71.911
CXCL1 (Normalized to day 0 CellTag)						CXCL1 (Scaled to 100% for visualization)
Biol Rep	Mock Transfection	Conventional saRNA	E3	E3-NSs-L*		Biol Rep	Mock Transfection	Conventional saRNA	E3	E3-NSs-L*
A	298.838	584.438	500.573	704.781		A	42.4016	82.9248	71.0254	100
B	515.44	538.115	471.401	574.07		B	89.7869	93.7368	82.1156	100
C	154.746	501.241	2426.99	865.593		C	6.37605	20.6528	100	35.6654
D	240.149	2238.76	2832.3	5951.7		D	4.03497	37.6156	47.5882	100
E	110.6	996.5	658.243	621.233		E	11.0988	100	66.0555	62.3415
F	74.8161	656.723	863.651	572.512		F	8.66277	76.0403	100	66.2898
						Average	27.0602	68.495	77.7974	77.3828
TNF (Normalized to day 0 CellTag)						TNF (Scaled to 100% for visualization)
Biol Rep	Mock Transfection	Conventional saRNA	E3	E3-NSs-L*		Biol Rep	Mock Transfection	Conventional saRNA	E3	E3-NSs-L*
A	2.63123	99.4264	51.8499	57.1368		A	2.64641	100	52.1491	57.4664
B	3.34328	102.702	57.4059	66.4349		B	3.25533	100	55.8958	64.6873
C	1.08846	48.2137	54.4468	22.7727		C	1.99912	88.552	100	41.8257
D	0.591293	50.4265	14.7769	17.7491		D	1.17258	100	29.3038	35.198
E	1.7152	29.5619	9.8977	8.17035		E	5.80205	100	33.4813	27.6381
F	1.53031	25.0205	13.1907	9.78269		F	6.11623	100	52.7198	39.0987
						Average	3.49862	98.092	53.925	44.319
MCP-1 (Normalized to day 0 CellTag)						MCP-1 (Scaled to 100% for visualization)
Biol Rep	Mock Transfection	Conventional saRNA	E3	E3-NSs-L*		Biol Rep	Mock Transfection	Conventional saRNA	E3	E3-NSs-L*
A	755.045	2663.73	3648.83	2321.38		A	20.6928	73.0023	100	63.6199
B	900.46	1324.39	2604.56	1740.64		B	34.5724	50.8487	100	66.8304
C	532.314	1592.57	4992.22	2440.3		C	10.6629	31.901	100	48.8821
D	557.486	4471.32	6973.85	6076.32		D	7.99395	64.1155	100	87.1299
E	340.336	2741.97	3378.57	2597.71		E	10.0734	81.158	100	76.8879
F	253.896	2124.23	4905.9	3863.02		F	5.17532	43.2994	100	78.7424
						Average	14.8618	57.3875	100	70.3488
IL-12p70 (Normalized to day 0 CellTag)						IL-12p70 (Scaled to 100% for visualization)
Biol Rep	Mock Transfection	Conventional saRNA	E3	E3-NSs-L*		Biol Rep	Mock Transfection	Conventional saRNA	E3	E3-NSs-L*
A	1.11836	6.28728	6.51206	4.39628		A	17.1736	96.5483	100	67.5097
B	1.85617	7.22439	7.30184	7.54348		B	24.6063	95.77	96.7967	100
C	2.32269	4.24311	6.77939	4.46514		C	34.261	62.5884	100	65.8634
D	0.956326	6.82416	12.3196	17.3723		D	5.50488	39.2818	70.9153	100
E	0.735084	4.51933	3.88773	2.78599		E	16.2653	100	86.0245	61.646
F	1.04839	4.91719	9.24444	6.42602		F	11.3407	53.1908	100	69.5122
						Average	18.192	74.5632	92.2894	77.4219
CCL5 (Normalized to day 0 CellTag)						CCL5 (Scaled to 100% for visualization)
Biol Rep	Mock Transfection	Conventional saRNA	E3	E3-NSs-L*		Biol Rep	Mock Transfection	Conventional saRNA	E3	E3-NSs-L*
A	66.4085	1975.31	947.121	747.841		A	3.36193	100	47.948	37.8594
B	63.0012	1345.28	918.014	812.362		B	4.68314	100	68.2397	60.3861
C	4.36355	1375.43	1689.97	790.086		C	0.258203	81.3879	100	46.7515
D	25.9777	5277.75	7059.64	5808.72		D	0.367974	74.7594	100	82.2807
E	0.535999	5788.59	3111.17	3338.7		E	0.00925957	100	53.7466	57.6773
F	16.3515	1199.02	1421.02	1301.67		F	1.15069	84.3776	100	91.6014
						Average	1.63853	90.0875	78.3224	62.7594
IL-1β (Normalized to day 0 CellTag)						IL-1β (Scaled to 100% for visualization)
Biol Rep	Mock Transfection	Conventional saRNA	E3	E3-NSs-L*		Biol Rep	Mock Transfection	Conventional saRNA	E3	E3-NSs-L*
A	1.75644	29.0263	16.9546	5.40283		A	6.05119	100	58.4111	18.6136
B	3.86431	18.0779	16.237	16.2633		B	21.3758	100	89.8166	89.9622
C	1.23423	20.2232	30.2668	14.7781		C	4.07785	66.8164	100	48.8262
D	0.775318	22.0929	24.1566	29.7916		D	2.60248	74.1583	81.0852	100
E	0	18.8016	16.4794	18.9391		E	0	99.2739	87.0127	100
F	1.09066	14.3704	22.379	17.2226		F	4.8736	64.2138	100	76.9589
						Average	6.49683	84.0771	86.0543	72.3935
CXCL10 (Normalized to day 0 CellTag)						CXCL10 (Scaled to 100% for visualization)
Biol Rep	Mock Transfection	Conventional saRNA	E3	E3-NSs-L*		Biol Rep	Mock Transfection	Conventional saRNA	E3	E3-NSs-L*
A	9.04634	1182.9	696.544	334.813		A	0.76476	100	58.8845	28.3044
B	9.14517	833.399	586.149	327.04		B	1.09733	100	70.3323	39.2417
C	8.23146	985.675	1360.96	753.845		C	0.604825	72.4247	100	55.3904
D	4.62174	1392.18	3448.4	1137.02		D	0.134026	40.3717	100	32.9723
E	2.30479	935.634	1065.93	689.93		E	0.216223	87.776	100	64.7255
F	3.82155	623.657	1016.71	530.884		F	0.375875	61.3408	100	52.216
						Average	0.532174	76.9855	88.2028	45.4751
GM-CSF (Normalized to day 0 CellTag)						GM-CSF (Scaled to 100% for visualization)
Biol Rep	Mock Transfection	Conventional saRNA	E3	E3-NSs-L*		Biol Rep	Mock Transfection	Conventional saRNA	E3	E3-NSs-L*
A	6.0206	67.8503	50.7912	113.149		A	5.32097	59.9656	44.8889	100
B	13.5468	44.2451	48.3106	98.476		B	13.7564	44.9299	49.0583	100
C	17.5708	30.7005	40.298	46.5487		C	37.7472	65.9536	86.5716	100
D	6.29304	40.8593	49.9256	109.22		D	5.76181	37.4102	45.7111	100
E	6.53918	26.6483	21.57	31.1055		E	21.0226	85.6708	69.3448	100
F	5.58859	23.1807	34.4052	30.4062		F	16.2435	67.3755	100	88.3768
						Average	16.6421	60.2176	65.9291	98.0628
IL-10 (Normalized to day 0 CellTag)						IL-10 (Scaled to 100% for visualization)
Biol Rep	Mock Transfection	Conventional saRNA	E3	E3-NSs-L*		Biol Rep	Mock Transfection	Conventional saRNA	E3	E3-NSs-L*
A	5.02918	46.5958	33.9962	22.3514		A	10.7932	100	72.9598	47.9688
B	8.41247	28.7449	38.3827	51.3666		B	16.3773	55.9603	74.723	100
C	1.0593	25.1533	24.5072	19.8826		C	4.21138	100	97.4311	79.0456
D	2.43456	22.7208	31.5976	38.9441		D	6.25141	58.342	81.1358	100
E	0	14.1291	16.0769	9.22096		E	0	87.8846	100	57.3553
F	0.126821	7.97423	19.7065	16.485		F	0.643549	40.465	100	83.6525
						Average	6.37948	73.7753	87.7083	78.0037
IFN-β (Normalized to day 0 CellTag)						IFN-β (Scaled to 100% for visualization)
Biol Rep	Mock Transfection	Conventional saRNA	E3	E3-NSs-L*		Biol Rep	Mock Transfection	Conventional saRNA	E3	E3-NSs-L*
A	5.11837	2520.64	89.5155	38.5155		A	0.203058	100	3.5513	1.528
B	6.05155	1392.12	80.4003	65.6694		B	0.434701	100	5.77539	4.71722
C	10.2918	1144.3	85.8488	54.2678		C	0.899395	100	7.50231	4.74246
D	3.62619	2711.7	152.604	86.4628		D	0.133724	100	5.62761	3.18851
E	7.45804	1703.27	90.4377	59.0545		E	0.437867	100	5.30967	3.46713
F	0.811656	1097.19	82.7941	42.0979		F	0.0739756	100	7.54599	3.83687
						Average	0.363787	100	5.88538	3.58003
IFN-α (Normalized to day 0 CellTag)						IFN-α (Scaled to 100% for visualization)
Biol Rep	Mock Transfection	Conventional saRNA	E3	E3-NSs-L*		Biol Rep	Mock Transfection	Conventional saRNA	E3	E3-NSs-L*
A	0.25386	20.4861	5.01821	1.79107		A	1.23918	100	24.4957	8.74289
B	0.824965	8.92025	3.33066	2.68877		B	9.24822	100	37.3382	30.1423
C	0.583102	12.9647	12.9431	4.44435		C	4.49761	100	99.8329	34.2803
D	0.446486	33.9876	22.0459	24.1435		D	1.31367	100	64.8646	71.036
E	0.130171	33.5266	7.50561	7.27452		E	0.388261	100	22.387	21.6977
F	0.202914	24.2149	18.7137	9.89043		F	0.837971	100	77.2815	40.8444
						Average	2.92082	100	54.3667	34.4573
IL-6 (Normalized to day 0 CellTag)						IL-6 (Scaled to 100% for visualization)
Biol Rep	Mock Transfection	Conventional saRNA	E3	E3-NSs-L*		Biol Rep	Mock Transfection	Conventional saRNA	E3	E3-NSs-L*
A	190.91	822.482	302.369	234.29		A	23.2114	100	36.763	28.4858
B	460.764	833.891	452.746	320.411		B	55.2547	100	54.2932	38.4236
C	46.8523	1161.52	4348.38	1174.84		C	1.07746	26.7115	100	27.0179
D	324.185	3142.22	7534.61	11984.7		D	2.705	26.2187	62.8687	100
E	56.188	1822.5	1158.18	997.27		E	3.08302	100	63.5491	54.7199
F	108.635	3456.76	5971.59	3549.46		F	1.8192	57.8868	100	59.4391
						Average	14.5251	68.4695	69.579	51.3477
