# Supplementary material for: Cap-independent co-expression of dsRNA-sensing and NF-κB pathway inhibitors enables controllable self-amplifying RNA expression with reduced immunotoxicity
Source: eLife. 2025 Aug 29;14:RP105978. doi: 10.7554/eLife.105978 (PMC12396818; doi:10.7554/eLife.105978)
Supplement: Figure 4—figure supplement 2—source data 1. [file elife-105978-fig4-figsupp2-data1.xlsx]

## Sheet: Sheet1
Appendix 4—Figure 2
IFN-γ (Normalized to day 0 CellTag)						IFN-γ (Scaled to 100% for visualization)
Biol Rep	Mock Transfection	moxBFP	srIκBα	srIκBα-Smad7-SOCS1		Biol Rep	Mock Transfection	moxBFP	srIκBα	srIκBα-Smad7-SOCS1
A	0.466554	1.94758	1.41927	1.54974		A	23.9556	100	72.8734	79.5728
B	0.721844	2.98224	2.27492	1.48237		B	24.2048	100	76.2823	49.7066
C	0.816343	1.47633	0.710047	0.800749		C	55.2956	100	48.0955	54.2393
D	0.355982	2.55662	0.900326	0.68472		D	13.924	100	35.2155	26.7823
E	0.581941	0.560854	0.350205	0.440989		E	100	96.3764	60.1788	75.779
F	0.363554	1.81029	0.656826	0.713198		F	20.0827	100	36.283	39.3969
						Average	39.5771	99.3961	54.8214	54.2462
CXCL1 (Normalized to day 0 CellTag)						CXCL1 (Scaled to 100% for visualization)
Biol Rep	Mock Transfection	moxBFP	srIκBα	srIκBα-Smad7-SOCS1		Biol Rep	Mock Transfection	moxBFP	srIκBα	srIκBα-Smad7-SOCS1
A	298.838	777.64	164.229	160.671		A	38.4289	100	21.119	20.6613
B	515.44	462.846	185.615	369.899		B	100	89.7964	36.011	71.7637
C	154.746	750.051	321.568	132.357		C	20.6314	100	42.8729	17.6464
D	240.149	1669.42	259.397	346.378		D	14.3852	100	15.5381	20.7483
E	110.6	275.383	88.7265	114.442		E	40.162	100	32.2193	41.5572
F	74.8161	468.271	194.956	108.909		F	15.9771	100	41.6332	23.2576
						Average	38.2641	98.2994	31.5656	32.6058
TNF (Normalized to day 0 CellTag)						TNF (Scaled to 100% for visualization)
Biol Rep	Mock Transfection	moxBFP	srIκBα	srIκBα-Smad7-SOCS1		Biol Rep	Mock Transfection	moxBFP	srIκBα	srIκBα-Smad7-SOCS1
A	2.63123	52.8628	29.9639	16.3212		A	4.97746	100	56.6824	30.8746
B	3.34328	57.8801	36.7262	56.2722		B	5.77621	100	63.4523	97.2221
C	1.08846	18.7565	22.6	12.6396		C	4.81619	82.9936	100	55.9276
D	0.591293	7.54349	7.92398	7.01023		D	7.46207	95.1981	100	88.4685
E	1.7152	4.45546	4.5838	5.82596		E	29.4406	76.476	78.6789	100
F	1.53031	6.35386	6.74176	5.10442		F	22.699	94.2464	100	75.7135
						Average	12.5286	91.4857	83.1356	74.701
MCP-1 (Normalized to day 0 CellTag)						MCP-1 (Scaled to 100% for visualization)
Biol Rep	Mock Transfection	moxBFP	srIκBα	srIκBα-Smad7-SOCS1		Biol Rep	Mock Transfection	moxBFP	srIκBα	srIκBα-Smad7-SOCS1
A	755.045	2371.64	692.993	675.674		A	31.8364	100	29.22	28.4897
B	900.46	1509.61	616.338	1029.73		B	59.6485	100	40.8276	68.2113
C	532.314	2490.86	999.043	1070.98		C	21.3707	100	40.1083	42.9963
D	557.486	4510.88	1112.69	1674.05		D	12.3587	100	24.6668	37.1115
E	340.336	1407.35	502.218	790.414		E	24.1827	100	35.6853	56.1632
F	253.896	3126.8	1196.19	906.275		F	8.12	100	38.2562	28.9841
						Average	26.2528	100	34.794	43.6594
IL-12p70 (Normalized to day 0 CellTag)						IL-12p70 (Scaled to 100% for visualization)
Biol Rep	Mock Transfection	moxBFP	srIκBα	srIκBα-Smad7-SOCS1		Biol Rep	Mock Transfection	Native saRNA	E3	E3-NSs-L*
A	1.11836	4.82803	2.38958	4.03491		A	23.1639	100	49.4939	83.5727
B	1.85617	4.71158	3.85826	6.04498		B	30.706	77.942	63.8258	100
C	2.32269	4.12654	1.70155	1.86841		C	56.2867	100	41.2344	45.278
D	0.956326	7.03216	2.67302	1.53247		D	13.5993	100	38.0113	21.7923
E	0.735084	1.62373	0.875514	1.34257		E	45.2713	100	53.9199	82.684
F	1.04839	4.75235	1.82796	1.85541		F	22.0604	100	38.4643	39.0419
						Average	31.8479	96.3237	47.4916	62.0615
CCL5 (Normalized to day 0 CellTag)						CCL5 (Scaled to 100% for visualization)
Biol Rep	Mock Transfection	moxBFP	srIκBα	srIκBα-Smad7-SOCS1		Biol Rep	Mock Transfection	moxBFP	srIκBα	srIκBα-Smad7-SOCS1
A	66.4085	722.224	126.575	99.4069		A	9.195	100	17.5258	13.764
B	63.0012	484.851	171.965	297.975		B	12.9939	100	35.4676	61.457
C	4.36355	637.747	231.379	254.538		C	0.684213	100	36.2807	39.9121
D	25.9777	2858.96	330.109	536.067		D	0.908639	100	11.5465	18.7504
E	0.535999	858.95	131.024	245.136		E	0.0624016	100	15.2539	28.539
F	16.3515	1203.39	298.809	297.371		F	1.35879	100	24.8307	24.7112
						Average	4.20049	100	23.4842	31.1889
IL-1β (Normalized to day 0 CellTag)						IL-1β (Scaled to 100% for visualization)
Biol Rep	Mock Transfection	moxBFP	srIκBα	srIκBα-Smad7-SOCS1		Biol Rep	Mock Transfection	moxBFP	srIκBα	srIκBα-Smad7-SOCS1
A	1.75644	10.5726	4.54744	3.93718		A	16.6132	100	43.0118	37.2396
B	3.86431	8.43496	3.76726	5.46743		B	45.813	100	44.6625	64.8187
C	1.23423	15.5117	7.86809	5.32721		C	7.9568	100	50.7236	34.3432
D	0.775318	20.0386	8.93895	8.33257		D	3.86913	100	44.6087	41.5826
E	0	9.58551	3.35419	5.07138		E	0	100	34.9923	52.9067
F	1.09066	14.1856	8.03063	6.15099		F	7.68851	100	56.611	43.3607
						Average	13.6568	100	45.7683	45.7086
CXCL10 (Normalized to day 0 CellTag)						CXCL10 (Scaled to 100% for visualization)
Biol Rep	Mock Transfection	moxBFP	srIκBα	srIκBα-Smad7-SOCS1		Biol Rep	Mock Transfection	Native saRNA	E3	E3-NSs-L*
A	9.04634	429.547	125.04	81.0892		A	2.10602	100	29.1098	18.8778
B	9.14517	233.126	161.21	148.064		B	3.92284	100	69.1512	63.5122
C	8.23146	719.248	528.371	425.826		C	1.14445	100	73.4616	59.2044
D	4.62174	1107.83	553.085	489.998		D	0.417189	100	49.9251	44.2305
E	2.30479	564.992	342.373	303.592		E	0.407934	100	60.5978	53.7338
F	3.82155	566.771	495.526	332.971		F	0.674266	100	87.4295	58.7487
						Average	1.44545	100	61.6125	49.7179
GM-CSF (Normalized to day 0 CellTag)						GM-CSF (Scaled to 100% for visualization)
Biol Rep	Mock Transfection	moxBFP	srIκBα	srIκBα-Smad7-SOCS1		Biol Rep	Mock Transfection	moxBFP	srIκBα	srIκBα-Smad7-SOCS1
A	6.0206	97.1334	17.1036	23.0646		A	6.19829	100	17.6084	23.7453
B	13.5468	63.2093	22.9311	42.4881		B	21.4317	100	36.2781	67.2182
C	17.5708	32.3715	14.7383	12.9454		C	54.2786	100	45.5285	39.9902
D	6.29304	48.7902	12.2942	11.9772		D	12.8982	100	25.1981	24.5483
E	6.53918	16.7629	4.77836	10.3926		E	39.0099	100	28.5056	61.998
F	5.58859	26.6626	10.9956	11.1242		F	20.9604	100	41.2399	41.7223
						Average	25.7962	100	32.3931	43.2037
IL-10 (Normalized to day 0 CellTag)						IL-10 (Scaled to 100% for visualization)
Biol Rep	Mock Transfection	moxBFP	srIκBα	srIκBα-Smad7-SOCS1		Biol Rep	Mock Transfection	moxBFP	srIκBα	srIκBα-Smad7-SOCS1
A	5.02918	24.2711	16.9733	17.5917		A	20.7209	100	69.9321	72.48
B	8.41247	36.8456	17.9263	26.3361		B	22.8317	100	48.6526	71.4769
C	1.0593	11.0673	11.9557	9.41993		C	8.86026	92.5697	100	78.7905
D	2.43456	25.8835	7.35639	6.974		D	9.40582	100	28.4211	26.9438
E	0	3.83969	2.08567	1.65126		E	0	100	54.3186	43.005
F	0.126821	15.419	2.53436	2.55221		F	0.822496	100	16.4365	16.5523
						Average	10.4402	98.7616	52.9602	51.5414
IFN-β (Normalized to day 0 CellTag)						IFN-β (Scaled to 100% for visualization)
Biol Rep	Mock Transfection	moxBFP	srIκBα	srIκBα-Smad7-SOCS1		Biol Rep	Mock Transfection	moxBFP	srIκBα	srIκBα-Smad7-SOCS1
A	5.11837	51.9627	20.6952	20.3142		A	9.85009	100	39.8271	39.0938
B	6.05155	43.2159	24.8057	34.7105		B	14.003	100	57.3994	80.3187
C	10.2918	46.6222	36.6154	38.0578		C	22.0748	100	78.5364	81.6303
D	3.62619	75.67	34.2907	46.8544		D	4.79212	100	45.3161	61.9194
E	7.45804	45.7743	21.8801	30.541		E	16.2931	100	47.7998	66.7207
F	0.811656	40.6917	19.7358	25.7052		F	1.99465	100	48.5007	63.1707
						Average	11.5013	100	52.8966	65.4756
IFN-α (Normalized to day 0 CellTag)						IFN-α (Scaled to 100% for visualization)
Biol Rep	Mock Transfection	moxBFP	srIκBα	srIκBα-Smad7-SOCS1		Biol Rep	Mock Transfection	moxBFP	srIκBα	srIκBα-Smad7-SOCS1
A	0.25386	1.70208	0.926868	0.837698		A	14.9147	100	54.4549	49.216
B	0.824965	1.90581	1.25575	1.69413		B	43.2869	100	65.8909	88.8933
C	0.583102	4.46999	2.34763	2.49122		C	13.0448	100	52.5199	55.7321
D	0.446486	11.7986	4.64982	5.43791		D	3.78422	100	39.4098	46.0893
E	0.130171	3.51024	1.60705	3.26332		E	3.70832	100	45.7819	92.9657
F	0.202914	8.25206	4.85184	5.46512		F	2.45895	100	58.7955	66.2273
						Average	13.533	100	52.8088	66.5206
IL-6 (Normalized to day 0 CellTag)						IL-6 (Scaled to 100% for visualization)
Biol Rep	Mock Transfection	moxBFP	srIκBα	srIκBα-Smad7-SOCS1		Biol Rep	Mock Transfection	moxBFP	srIκBα	srIκBα-Smad7-SOCS1
A	190.91	275.967	33.3383	15.2322		A	69.1785	100	12.0805	5.51956
B	460.764	202.527	59.803	87.0554		B	100	43.9546	12.9791	18.8937
C	46.8523	1131.35	277.743	104.147		C	4.14128	100	24.5498	9.20561
D	324.185	3535.64	599.597	537.19		D	9.16908	100	16.9587	15.1936
E	56.188	389.339	84.7575	91.0839		E	14.4316	100	21.7696	23.3945
F	108.635	2865.54	1303.29	463.68		F	3.79108	100	45.4815	16.1812
						Average	33.4519	90.6591	22.3032	14.7314
