# Supplementary material for: Cap-independent co-expression of dsRNA-sensing and NF-κB pathway inhibitors enables controllable self-amplifying RNA expression with reduced immunotoxicity
Source: eLife. 2025 Aug 29;14:RP105978. doi: 10.7554/eLife.105978 (PMC12396818; doi:10.7554/eLife.105978)
Supplement: Figure 4—figure supplement 3—source data 1. [file elife-105978-fig4-figsupp3-data1.xlsx]

## Sheet: Sheet1
Appendix 5—Figure 1a
Adar (Normalized to 18s, ΔCT)						Adar (Scaled to 100% for visualization)
Biol Rep	Mock Transfection	Conventional saRNA	E3	srIκBα-Smad7-SOCS1		Biol Rep	Mock Transfection	Conventional saRNA	E3	srIκBα-Smad7-SOCS1
A	16.966	12.577	13.8444	14.1111		A	100	74.1305	81.6013	83.1731
B	18.9289	14.1774	13.9087	14.9309		B	100	74.8981	73.4787	78.8789
C	18.0224	13.1555	14.511	16.1208		C	100	72.9951	80.5166	89.4489
						Average	100	74.0079	78.5322	83.8336
Isg20 (Normalized to 18s, ΔCT)						Isg20 (Scaled to 100% for visualization)
Biol Rep	Mock Transfection	Conventional saRNA	E3	srIκBα-Smad7-SOCS1		Biol Rep	Mock Transfection	Conventional saRNA	E3	srIκBα-Smad7-SOCS1
A	15.1383	11.8866	14.0859	13.5236		A	100	78.5203	93.0477	89.3337
B	15.5394	13.1359	13.9549	14.9198		B	100	84.5328	89.803	96.0125
C	14.7701	11.8652	14.6057	14.9483		C	98.8078	79.3749	97.708	100
						Average	99.6026	80.8093	93.5196	95.1154
Ddx58 (Normalized to 18s, ΔCT)						Ddx58 (Scaled to 100% for visualization)
Biol Rep	Mock Transfection	Conventional saRNA	E3	srIκBα-Smad7-SOCS1		Biol Rep	Mock Transfection	Conventional saRNA	E3	srIκBα-Smad7-SOCS1
A	13.0793	9.42642	10.5125	10.4356		A	100	72.0716	80.3756	79.7874
B	14.1267	10.8691	10.7404	11.0147		B	100	76.9401	76.0289	77.9709
C	13.7311	9.75066	11.2514	12.1852		C	100	71.0116	81.9412	88.742
						Average	100	73.3411	79.4486	82.1668
Ifih1 (Normalized to 18s, ΔCT)						Ifih1 (Scaled to 100% for visualization)
Biol Rep	Mock Transfection	Conventional saRNA	E3	srIκBα-Smad7-SOCS1		Biol Rep	Mock Transfection	Conventional saRNA	E3	srIκBα-Smad7-SOCS1
A	17.6246	11.7782	13.3719	13.0301		A	100	66.8279	75.8704	73.9315
B	18.576	13.2753	13.202	13.8336		B	100	71.4648	71.0701	74.4703
C	18.1874	11.7703	13.7891	15.3499		C	100	64.7168	75.8164	84.3984
						Average	100	67.6698	74.2523	77.6
Tlr3 (Normalized to 18s, ΔCT)						Ifih1 (Scaled to 100% for visualization)
Biol Rep	Mock Transfection	Conventional saRNA	E3	srIκBα-Smad7-SOCS1		Biol Rep	Mock Transfection	Conventional saRNA	E3	srIκBα-Smad7-SOCS1
A	17.091	13.123	15.3839	14.9292		A	100	76.7833	90.0119	87.3516
B	18.8248	15.268	15.6329	15.775		B	100	81.1057	83.0445	83.7989
C	17.795	13.7798	16.7152	17.8566		C	99.6553	77.1696	93.6082	100
						Average	99.8851	78.3529	88.8882	90.3835
Eif2ak2 (Normalized to 18s, ΔCT)						Eif2ak2 (Scaled to 100% for visualization)
Biol Rep	Mock Transfection	Conventional saRNA	E3	srIκBα-Smad7-SOCS1		Biol Rep	Mock Transfection	Conventional saRNA	E3	srIκBα-Smad7-SOCS1
A	14.124	11.1554	12.0415	12.3109		A	100	78.9816	85.2552	87.1631
B	14.8404	13.3245	12.2492	12.8146		B	100	89.7849	82.5395	86.3495
C	14.1797	12.1824	12.4433	13.569		C	100	85.9148	87.7543	95.6936
						Average	100	84.8938	85.183	89.7354
Zc3hav1 (Normalized to 18s, ΔCT)						Zc3hav1 (Scaled to 100% for visualization)
Biol Rep	Mock Transfection	Conventional saRNA	E3	srIκBα-Smad7-SOCS1		Biol Rep	Mock Transfection	Conventional saRNA	E3	srIκBα-Smad7-SOCS1
A	14.1894	10.9272	12.1126	12.3884		A	100	77.0095	85.3638	87.307
B	15.4672	12.8026	12.1193	12.5474		B	100	82.7722	78.3547	81.1222
C	15.2675	11.3826	12.2861	13.2391		C	100	74.554	80.472	86.7142
						Average	100	78.1119	81.3968	85.0478
Rnasel (Normalized to 18s, ΔCT)						Rnasel (Scaled to 100% for visualization)
Biol Rep	Mock Transfection	Conventional saRNA	E3	srIκBα-Smad7-SOCS1		Biol Rep	Mock Transfection	Conventional saRNA	E3	srIκBα-Smad7-SOCS1
A	16.1761	15.4585	16.7085	16.2197		A	96.814	92.5189	100	97.0744
B	18.3914	17.2668	17.327	17.6819		B	100	93.8856	94.2127	96.1426
C	18.1607	16.0962	17.7081	17.8205		C	100	88.6324	97.5081	98.1269
						Average	98.938	91.679	97.2403	97.1147
Il6 (Normalized to 18s, ΔCT)						Il6 (Scaled to 100% for visualization)
Biol Rep	Mock Transfection	Conventional saRNA	E3	srIκBα-Smad7-SOCS1		Biol Rep	Mock Transfection	Conventional saRNA	E3	srIκBα-Smad7-SOCS1
A	15.3208	12.0114	13.3256	13.5903		A	100	78.3992	86.9773	88.7047
B	18.319	14.4326	12.8117	16.3837		B	100	78.7847	69.9368	89.4355
C	19.064	14.7079	16.7437	19.9645		C	95.4896	73.6703	83.8674	100
						Average	98.4965	76.9514	80.2605	92.7134
18s (CT)
Biol Rep	Mock Transfection	Conventional saRNA	E3	srIκBα-Smad7-SOCS1
A	15.3208	12.0114	13.3256	13.5903
B	15.249	16.6922	15.6723	15.1574
C	15.8007	18.0675	16.3099	15.7222
Oas1e (CT)
Biol Rep	Mock Transfection	Conventional saRNA	E3	srIκBα-Smad7-SOCS1
A	nd	38.084	nd	nd
B	nd	nd	nd	nd
C	nd	nd	nd	nd
Ifnb1 (CT)
Biol Rep	Mock Transfection	Conventional saRNA	E3	srIκBα-Smad7-SOCS1
A	nd	30.121	31.7927	29.8094
B	nd	31.1994	34.7991	34.3298
C	nd	32.9626	32.9207	33.5661
Ifna2 (CT)
Biol Rep	Mock Transfection	Conventional saRNA	E3	srIκBα-Smad7-SOCS1
A	nd	nd	37.9394	36.287
B	nd	nd	nd	nd
C	nd	nd	38.2547	39.7488
IfnG (CT)
Biol Rep	Mock Transfection	Conventional saRNA	E3	srIκBα-Smad7-SOCS1
A	nd	37.8603	37.277	nd
B	nd	nd	nd	nd
C	nd	nd	nd	nd
TNF (CT)
Biol Rep	Mock Transfection	Conventional saRNA	E3	srIκBα-Smad7-SOCS1
A	36.2956	34.2167	35.2265	34.9685
B	38.0798	35.9163	36.4486	36.6246
C	39.2375	nd	37.7779	39.0465
Appendix 5—Figure 1b
Egfp (Normalized to 18s, ΔCT)
Biol Rep	Conventional saRNA	E3	srIκBα-Smad7-SOCS1
A	10.8444	10.7312	12.6687
B	10.5671	9.74389	11.8572
C	8.23472	7.72153	10.257
