# Supplementary material for: Cap-independent co-expression of dsRNA-sensing and NF-κB pathway inhibitors enables controllable self-amplifying RNA expression with reduced immunotoxicity
Source: eLife. 2025 Aug 29;14:RP105978. doi: 10.7554/eLife.105978 (PMC12396818; doi:10.7554/eLife.105978)
Supplement: Figure 5—figure supplement 1—source data 1. [file elife-105978-fig5-figsupp1-data1.xlsx]

## Sheet: Sheet1
Appendix 6—figure 1a
BioTracker AUC (AU × days)
Biol Rep	Mock Transfection	moxBFP	srIкBα	srIкBα-smad7-SOCS1
A	28.84	16.45	13.63	27.46
B	31.02	15.33	11.79	21.64
C	30.54	25.39	18.32	35.18
D	17.31	28.84	25.83	45.83
E	34.47	24.22	14.22	32.98
F	28.19	27.72	18.89	36.92
G	40.14	24	12.49	44.8
H	48.73	36.42	15.92	52.03
I	34.81	27.28	24.06	51.38
J	64.31	40.44	17.26	46.31
K	52.12	23.03	11.67	30.37
Appendix 6—figure 1b
CellTag signal (normalized to mock transfection)
Biol Rep	moxBFP	srIкBα	srIкBα-smad7-SOCS1
A	1.29193	1.17295	1.1685
B	1.34834	1.33579	1.24203
C	1.0519	1.01588	1.01849
D	1.15895	1.02662	1.09497
E	1.02975	0.963704	1.05775
F	0.987762	0.652607	1.07642
G	0.833169	0.544603	0.835524
H	1.68958	1.14813	1.41199
I	0.963709	0.909029	0.884692
J	0.823326	0.825728	0.927204
K	0.856373	0.772401	0.894428
L	0.966448	0.814125	1.03997
M	0.788206	0.738117	0.817818
N	0.876531	0.659717	0.881242
O	0.97316	0.897793	1.08008
P	0.894337	0.763716	0.877556
Q	1.10319	0.971512	1.37877
R	0.661482	0.513646	0.778247
S	0.683454	0.492208	0.734496
T	1.02636	0.66618	0.854761
Appendix 6—figure 1c
Calcien AM signal (normalized to moxBFP)
Biol Rep	srIкBα	srIкBα-smad7-SOCS1
A	0.735233	1.28826
B	0.477035	1.1287
C	0.57677	0.732002
D	0.736036	1.01763
