# Supplementary material for: Cap-independent co-expression of dsRNA-sensing and NF-κB pathway inhibitors enables controllable self-amplifying RNA expression with reduced immunotoxicity
Source: eLife. 2025 Aug 29;14:RP105978. doi: 10.7554/eLife.105978 (PMC12396818; doi:10.7554/eLife.105978)
Supplement: Figure 5—source data 1. [file elife-105978-fig5-data1.xlsx]

## Sheet: Sheet1
Figure 5c
BioTracker signal (normalized to day 0 BioTracker signal)
Biol Rep:	A	B	C	D	E	F	G	H	I	J	K	A	B	C	D	E	F	G	H	I	J	K	A	B	C	D	E	F	G	H	I	J	K	A	B	C	D	E	F	G	H	I	J	K
Day	Mock Transfection											moxBFP											srIкBα											srIкBα-smad7-SOCS1
1	1.62971	1.78422	1.86048	1.32131	1.90642	1.86346	2.33398	2.55954	2.10839	2.71082	2.59633	1.42667	1.45626	1.85141	2.36972	1.65673	1.7959	2.38946	3.02605	2.41253	2.063	1.95574	1.30609	1.2278	1.66104	1.86434	1.20965	1.65527	1.73076	2.10254	2.34213	1.07877	1.12533	1.75897	1.76305	2.24621	2.40002	1.8138	2.16417	3.04202	3.40057	2.83946	1.97659	1.92118
3	1.75888	1.93315	1.98287	1.09134	1.95277	1.68377	2.53868	3.03361	2.25014	3.45912	2.8374	1.0861	1.12729	1.87745	1.91972	1.65528	1.9656	1.82947	2.45718	2.09086	2.44704	1.50693	1.035	0.932439	1.50019	1.76914	1.07139	1.60937	1.06783	1.34867	2.09318	1.08686	0.749829	1.8821	1.6566	2.52543	2.74709	2.14565	2.66408	2.92372	3.43077	3.46965	2.60558	1.78804
7	1.63912	1.78801	1.71009	1.03043	1.74778	1.60327	2.24485	2.6748	1.85881	3.88848	3.03959	0.849925	0.878813	1.47855	1.67155	1.36116	1.48851	1.38653	1.98902	1.52328	2.47838	1.35358	0.766752	0.656073	1.09227	1.44319	0.783914	0.952143	0.70253	0.832241	1.33041	1.00347	0.68886	1.6311	1.25158	2.05251	2.64207	1.76486	2.01543	2.69738	2.9292	3.02576	2.74022	1.748
14	1.27907	1.38902	1.32194	0.792207	1.38328	1.23794	1.74867	2.06616	1.49367	3.049	2.49931	0.789659	0.591892	1.02387	1.21104	1.01596	1.19074	0.87363	1.44262	1.03625	1.864	0.986408	0.525266	0.44178	0.655659	1.11074	0.553236	0.711616	0.395135	0.513902	0.849205	0.767231	0.493508	1.12636	0.852818	1.44436	2.10394	1.35055	1.55522	1.86796	2.21913	2.21873	2.21059	1.42301
21	1.13177	1.10811	1.16429	0.430434	2.11681	1.08258	1.60181	2.25466	1.50613	2.42588	1.94191	0.446217	0.43328	0.743686	0.867717	0.856023	1.00162	0.681039	1.42447	0.846811	1.24366	0.630815	0.379403	0.304845	0.445607	0.842807	0.460454	0.626066	0.264124	0.45742	0.622174	0.579672	0.29926	0.912702	0.588049	1.13002	1.69338	1.59153	1.36851	1.45125	1.91093	1.70265	1.70722	1.0031
Figure 5d
EGFP signal (normalized to day 0 BioTracker signal)
Biol Rep:	A	B	C	D	E	F	G	H	I	J	K	A	B	C	D	E	F	G	H	I	J	K	A	B	C	D	E	F	G	H	I	J	K	A	B	C	D	E	F	G	H	I	J	K
Day	Mock Transfection											moxBFP											srIкBα											srIкBα-smad7-SOCS1
1	0.018392	0.032109	0.035451	0.016648	0.040714	0.058217	0.007615	0.005342	0.001336	0.001128	0.021547	0.151435	0.1366	0.057999	0.126348	0.079583	0.081587	0.108277	0.098187	0.17165	0.060021	0.1126	0.105495	0.1156	0.056183	0.068672	0.046983	0.053602	0.080979	0.068465	0.212631	0.033782	0.060123	0.130599	0.132799	0.078988	0.088812	0.084816	0.063681	0.082291	0.079068	0.122392	0.03018	0.032949
3	0.025874	0.038096	0.026212	0.01664	0.049925	0.042555	0.013179	0.013655	0.000205	0.041544	0.00873	0.126474	0.10406	0.040563	0.049977	0.050125	0.02685	0.095047	0.087609	0.149115	0.043047	0.074744	0.099119	0.103309	0.046353	0.047193	0.035566	0.032834	0.064937	0.064283	0.1666	0.005796	0.045791	0.092826	0.12213	0.056776	0.056379	0.05633	0.029388	0.085055	0.089829	0.115282	0.048885	0.052119
7	0.02842	0.038483	0.048861	0.020592	0.05492	0.055781	0.010938	0.008261	-0.00029	0.020926	0.017121	0.15053	0.122574	0.046087	0.025286	0.02985	0.020772	0.104175	0.056739	0.116569	0.069783	0.091816	0.133678	0.091908	0.048694	0.026324	0.025734	0.024118	0.040948	0.037571	0.102347	0.031997	0.048305	0.090365	0.112127	0.040252	0.020352	0.031015	0.017996	0.033705	0.028807	0.043881	0.038762	0.031341
14	0.017027	0.040359	0.060026	0.016261	0.048217	0.05616	0.025144	0.016302	0.008681	-0.00385	-0.00968	0.11939	0.118482	0.040796	0.038731	0.028486	0.023096	0.042367	0.019394	0.053431	0.003368	0.047789	0.080538	0.078038	0.065657	0.019874	0.030296	0.027346	0.029496	0.022933	0.045775	-0.01345	-0.01018	0.063231	0.102242	0.099248	0.01821	0.034737	0.021059	0.016129	0.0108	0.021704	-0.00306	-0.00297
21	0.017569	0.047368	0.058813	0.018026	0.050459	0.060004	0.01126	0.012507	0.007411	0.085867	0.048574	0.143439	0.137067	0.027404	0.022056	0.01855	0.030119	0.007433	0.006107	0.020835	0.023795	0.056872	0.113315	0.129015	0.044761	0.023691	0.020066	0.022515	0.01527	0.014274	0.02104	0.04483	0.012264	0.096468	0.124525	0.047682	0.015878	0.036427	0.02195	-0.00651	0.005547	0.002826	0.051902	0.02055
Figure 5e
mScarlet3 signal (normalized to day 0 BioTracker signal)
Biol Rep:	A	B	C	D	E	F	G	H	I	J	K	A	B	C	D	E	F	G	H	I	J	K	A	B	C	D	E	F	G	H	I	J	K	A	B	C	D	E	F	G	H	I	J	K
Day	Mock Transfection											moxBFP											srIкBα											srIкBα-smad7-SOCS1
1	0.013381	0.024425	0.024083	0.012882	0.029455	0.045531	-0.00096	-0.00249	0.001947	0.031075	0.06446	0.529675	0.527468	0.122696	0.464975	0.270634	0.222037	0.460587	0.164569	1.03009	0.49491	1.04974	0.340704	0.345162	0.088327	0.189876	0.114029	0.102875	0.370294	0.142015	1.48013	0.266729	0.748388	0.839419	0.703352	0.647693	0.972653	0.806469	0.578978	1.17427	0.684968	1.73512	0.467894	0.909777
3	0.023307	0.037866	0.0241	0.015227	0.04731	0.037993	0.002364	0.009939	0.004614	0.037362	0.012369	0.231883	0.27438	0.054697	0.082375	0.081685	0.050599	0.194249	0.082239	0.487983	0.219255	0.400428	0.25415	0.241359	0.061823	0.064516	0.058315	0.047471	0.176456	0.086229	0.98378	0.09502	0.352584	1.01433	0.790036	0.649995	0.781288	0.659268	0.442512	1.48988	0.982083	2.34565	0.539024	0.996912
7	0.024825	0.033633	0.047412	0.017872	0.048563	0.047164	0.010405	0.010514	0.007688	0.027738	0.027256	0.494102	0.352355	0.07471	0.048831	0.05304	0.035489	0.387568	0.101165	0.535979	0.344846	0.611705	0.492432	0.294973	0.090396	0.051476	0.04752	0.033679	0.447965	0.1003	1.04359	0.211824	0.505679	1.05692	0.75281	0.388643	0.480047	0.375763	0.255118	1.36757	0.714118	1.84676	0.623515	1.13036
14	0.01805	0.038905	0.062426	0.017097	0.05005	0.061139	0.021355	0.013607	0.015636	0.041561	0.035987	0.461548	0.33828	0.059904	0.049606	0.047668	0.032761	0.218562	0.051635	0.319266	0.252568	0.466989	0.376462	0.286676	0.084432	0.036048	0.043645	0.03276	0.189188	0.057556	0.443502	0.169279	0.373281	0.763277	0.607982	0.284704	0.277993	0.233109	0.161433	0.66654	0.331084	0.948123	0.647208	1.00223
21	0.019963	0.04793	0.063466	0.019089	0.056114	0.064015	0.011806	0.014802	0.018838	0.076758	0.050831	0.373249	0.310048	0.041629	0.031788	0.036124	0.035668	0.11013	0.028891	0.203085	0.186766	0.313853	0.28927	0.239023	0.060409	0.035912	0.032982	0.026422	0.136235	0.042956	0.258692	0.159783	0.233267	0.516498	0.458391	0.16596	0.195844	0.199123	0.119078	0.336581	0.200079	0.561211	0.517244	0.683983
