# Supplementary material for: Cap-independent co-expression of dsRNA-sensing and NF-κB pathway inhibitors enables controllable self-amplifying RNA expression with reduced immunotoxicity
Source: eLife. 2025 Aug 29;14:RP105978. doi: 10.7554/eLife.105978 (PMC12396818; doi:10.7554/eLife.105978)
Supplement: Figure 6—source data 1. [file elife-105978-fig6-data1.xlsx]

## Sheet: Sheet1
Figure 6a
phospho-eIF2α / Total eIF2α (normalized to mock transfection)
Biol Rep	moxBFP	srIкBα	srIкBα-smad7-SOCS1
A	1.01553	0.877001	1.02813
B	0.93401	0.854692	0.95672
C	1.08684	0.693136	0.988196
D	0.506276	0.360178	0.537701
E	0.699531	0.455261	0.95437
F	1.62288	1.14108	2.0281
Figure 6b
Total eIF2α / CellTag (normalized to mock transfection)
Biol Rep	moxBFP	srIкBα	srIкBα-smad7-SOCS1
A	1.33405	1.34089	1.15137
B	1.17929	1.33404	1.20399
C	1.15655	1.1536	1.1193
D	1.38034	1.3181	1.33758
E	1.22258	1.23371	1.08773
Figure 6c
phospho eIF4E / Total eIF4E (normalized to mock transfection)
Biol Rep	moxBFP	srIкBα	srIкBα-smad7-SOCS1
A	0.579714	0.2816	0.56455
B	0.695222	1.22859	0.47263
C	0.446368	0.753377	0.567056
D	1.28024	0.769597	0.581954
E	0.659704	0.254485	0.465741
F	1.27937	1.26592	0.859884
Figure 6d
Total eIF4E / CellTag (normalized to mock transfection)
Biol Rep	moxBFP	srIкBα	srIкBα-smad7-SOCS1
A	2.09681	1.72133	2.10356
B	0.708716	0.133229	0.667445
C	0.810767	0.523624	0.953446
D	1.04063	0.84587	1.13755
E	0.833457	0.693088	0.94152
F	0.939676	0.697791	0.825381
