# Supplementary material for: Cap-independent co-expression of dsRNA-sensing and NF-κB pathway inhibitors enables controllable self-amplifying RNA expression with reduced immunotoxicity
Source: eLife. 2025 Aug 29;14:RP105978. doi: 10.7554/eLife.105978 (PMC12396818; doi:10.7554/eLife.105978)
Supplement: Figure 7—source data 1. [file elife-105978-fig7-data1.xlsx]

## Sheet: Sheet1
Figure 7b
Fibroblast activation protein-α / CellTag (normalized to mock transfection)
Biol Rep	moxBFP	srIкBα	srIкBα-smad7-SOCS1
A	0.608255	0.761384	0.586557
B	1.10091	0.762243	0.774559
C	0.994772	0.930941	0.905232
D	0.91657	0.742485	0.678466
E	0.921482	0.780206	0.704094
F	0.883653	0.647116	0.612825
G	0.707998	0.711491	0.661188
H	0.53124	0.592056	0.566196
