# Supplementary material for: Cap-independent co-expression of dsRNA-sensing and NF-κB pathway inhibitors enables controllable self-amplifying RNA expression with reduced immunotoxicity
Source: eLife. 2025 Aug 29;14:RP105978. doi: 10.7554/eLife.105978 (PMC12396818; doi:10.7554/eLife.105978)
Supplement: Figure 8—source data 1. [file elife-105978-fig8-data1.xlsx]

## Sheet: Sheet1
Figure 8a
mScarlet3 fluorescence (% of vehicle)
	[ML336] (nM)
Biol Rep	1	3	10	30	100	300	1000	3000	10000
A	90.055	72.0208	32.9113	17.5647	5.6853	1.87785	7.3481	4.75209	12.0924
B	84.6653	80.7153	52.4467	15.1504	5.47854	3.32693	5.91374	4.15882	3.18779
C	125.989	102.118	72.0414	19.633	4.82742	0.805206	1.47227	0.450582	0.424853
D	76.7721	89.7171	24.51656*	21.955	10.8219	10.1944	0.77428	0.438172	1.03908
E	56.126	59.0778	32.5755	3.94499	-15.618	-35.1959	-32.6215	-23.2456	-5.77463
		* excluded due to dilution (pipetting) error
Figure 8b
change in mScarlet3 fluorescence after removal of ML336 (normalized to maximum change)
	[ML336] (nM)
Biol Rep	1	3	10	30	100	300	1000	3000	10000
A	-0.43307	-0.11209	-0.08492	0.84444	1	0.100914	-0.20593	-0.23537	-0.47612
B	-1.04459	-0.62866	-0.14547	0.475446	1	0.063554	-0.27117	-0.20993	-0.19971
C	-0.15306	-0.01243	0.238516	0.6618	1	0.192637	0.14302	0.185746	0.044825
D	-0.45174	0.174226	0.298344	0.473363	1	0.646223	0.279626	0.271854	0.049993
E	0.244985	0.21437	0.236076	0.293203	0.914911	1	0.236793	0.143649	0.125942
Figure 8e
EGFP signal (Normalized to day 0 biotracker, AU)
Biol Rep:	A	B	C	D	E	F	A	B	C	D	E	F	A	B	C	D	E	F
Day	Mock Transfection						Vehicle control						1 μM ML336
1	0.015116	0.015976	0.015141	0.026999	-0.00888	-0.01422	0.136464	0.148461	0.127836	0.081114	0.152061	0.100454	0.193832	0.176687	0.187787	0.11737	0.132922	0.107995
3	0.010576	0.007078	-0.00899	-0.00276	-0.00742	-0.00749	0.1387	0.104066	0.109476	0.012547	0.046833	0.056341	0.070852	0.072627	0.084846	0.019431	0.052872	0.058542
5	0.011715	0.017096	0.013656	0.005014	-0.02516	-0.01389	0.154047	0.065165	0.120307	0.001328	0.01642	0.068354	0.012861	0.024216	0.037389	0.04705	0.028218	0.021279
7	-0.03411	-0.03031	-0.03337	0.034496	0.026342	0.02237	0.060404	0.034835	0.067599	0.053584	0.064675	0.04862	0.014707	-0.01262	-0.01775	0.034683	0.060822	0.011167
9	-0.00662	0.001199	0.014932	0.031731	0.000845	0.018638	0.074511	0.048213	0.09587	0.017434	0.024931	0.049303	0.023644	0.021492	0.012995	0.043959	0.019025	-0.00708
11	-0.00815	-0.02245	-0.00076	0.055711	0.017101	0.00426	-0.00607	-0.00378	0.03149	0.040943	0.073065	0.000362	0.018937	0.005088	0.047816	0.012394	0.026955	0.005086
13	-0.01736	0.071235	-0.01972	-0.01691	-0.0062	-0.01546	-0.04011	-9.3e-05	0.032597	0.015619	0.001487	-0.01319	-0.02018	-0.01784	0.016043	-0.0122	-0.01758	-0.01742
Figure 8f
mScarlet3 signal (Normalized to day 0 biotracker, AU)
Biol Rep:	A	B	C	D	E	F	A	B	C	D	E	F	A	B	C	D	E	F
Day	Mock Transfection						Vehicle control						1 μM ML336
1	0.026832	0.025226	0.024201	0.032605	0.004651	0.024317	1.54408	2.0351	1.83571	0.877555	1.33737	1.35304	1.69917	2.28285	2.3336	1.04603	1.34979	1.42727
3	0.028365	0.026914	0.009819	0.019106	0.015944	0.050825	2.12983	2.35408	2.30351	0.637832	1.15839	1.42758	1.48221	1.86751	1.86705	0.680811	0.940112	1.07068
5	0.037007	0.034966	0.030788	0.076945	0.034215	0.008245	2.47398	2.51363	2.32849	0.775888	1.29815	1.59657	0.983088	1.34214	1.36439	0.458182	0.67811	0.7361
7	0.022005	0.025898	0.024315	0.081206	0.077612	0.043738	2.31227	2.44873	2.44577	0.840068	1.35489	1.46087	0.821906	1.04704	1.02668	0.325589	0.526101	0.524601
9	0.019341	0.024041	0.037371	0.051334	0.02862	0.048412	1.93238	2.09306	2.46067	0.72499	1.1726	1.16781	0.604678	0.73261	0.81137	0.246243	0.36082	0.350651
11	0.048005	0.025715	0.039404	0.085504	0.043253	0.040103	1.53357	1.71234	2.14169	0.78861	1.09157	0.902598	0.492683	0.614936	0.716397	0.197514	0.25334	0.308279
13	-0.02853	0.210604	-0.03423	-0.02502	-0.00191	-0.02278	1.20666	1.31665	1.76984	0.640044	0.878383	0.676248	0.307883	0.394781	0.550524	0.080765	0.151498	0.184867
Figure 8g
Calcien AM signal (AU)
Biol Rep	Mock	Vehicle	1 μM ML336
A	97.5913	65.8165	78.5279
B	87.802	52.9841	63.8638
C	77.6844	57.7567	67.1324
D	63.8537	30.6836	44.5161
E	57.1497	37.8614	51.4716
F	108.828	108.451	116.419
